# Supplementary material for: Achieving cuprous iodide hybrid materials with long luminescence lifetimes and high internal quantum yields via aggregation-induced emission
Source: Royal Society of Chemistry journal article supplement (doi:10.1039/d4ce00898g), 2024-12-17
Supplement: d4ce00898g1.pdf [file d4ce00898g1.pdf]

**Realizing cuprous iodide hybrid materials with long  
luminescence lifetimes and high internal quantum yields by  
aggregation-induced emission**

Zhen-Dong Xue,<sup>a</sup> Yi Zhang,<sup>a</sup> Hao-Yu Zhu,<sup>a</sup> Juan-Juan Shao,<sup>a</sup> Qiang Gao,<sup>a</sup> and Fang-Ming  
Wang,<sup>\*,a</sup>

<sup>a</sup> *School of Environmental and Chemical Engineering, Jiangsu University of Science and  
Technology, Zhenjiang, Jiangsu 212003, China*

Supporting Information

**Table S1. Selected bond lengths (Å) and bond angles (°) of Complex 1**

| Bond      | Dist.      | Bond      | Dist.      | Bond      | Dist.      |
|-----------|------------|-----------|------------|-----------|------------|
| Cu2-N1    | 2.6762(6)  | Cu2-P4    | 2.2816(13) | P3-C3     | 1.827(5)   |
| Cu2-P3    | 2.2683(12) | Cu2-N1    | 2.069(4)   | N1-C17    | 1.324(6)   |
| Angle     | (°)        | Angle     | (°)        | Angle     | (°)        |
| P3-Cu2-I1 | 107.81(4)  | P4-Cu2-P3 | 123.64(5)  | N1-Cu2-P3 | 108.39(12) |
| P4-Cu2-I1 | 107.30(4)  | N1-Cu2-I1 | 101.81(12) | N1-Cu2-P4 | 105.78(12) |

**Table S2. Selected bond lengths (Å) and bond angles (°) of Complex 2**

| Bond      | Dist.      | Bond      | Dist.      | Bond      | Dist.     |
|-----------|------------|-----------|------------|-----------|-----------|
| Cu2-I1    | 2.7074(6)  | Cu2-P3    | 2.2773(11) | Cu2-P4    | 2.296(12) |
| Cu2-N2    | 2.077(3)   | P3-C4     | 1.820(4)   | P4-C3     | 1.815(4)  |
| Angle     | (°)        | Angle     | (°)        | Angle     | (°)       |
| P3-Cu2-I1 | 103.05(3)  | P3-Cu2-P4 | 123.38(4)  | P4-Cu2-I1 | 106.38(3) |
| N2-Cu2-I1 | 102.58(10) | N2-Cu2-P3 | 115.34(10) | C4-P3-C22 | 105.0(2)  |

**Table S3. Selected bond lengths (Å) and bond angles (°) of Complex 3**

| Bond      | Dist.     | Bond      | Dist.     | Bond      | Dist.     |
|-----------|-----------|-----------|-----------|-----------|-----------|
| Cu2-I1    | 2.6791(4) | Cu2-P3    | 2.2876(8) | Cu2-P4    | 2.2768(8) |
| Cu2-N1    | 2.061(3)  | P3-C19    | 1.832(3)  | P4-C1     | 1.828(3)  |
| Angle     | (°)       | Angle     | (°)       | Angle     | (°)       |
| P3-Cu2-I1 | 107.08(2) | P4-Cu2-I1 | 105.31(2) | P4-Cu2-P3 | 123.46(3) |
| N1-Cu2-I1 | 107.37(9) | N1-Cu2-P3 | 105.07(8) | N1-Cu2-P4 | 107.71(8) |

**Table S4. Selected bond lengths (Å) and bond angles (°) of Complex 4**

| Bond      | Dist.       | Bond      | Dist.      | Bond      | Dist.     |
|-----------|-------------|-----------|------------|-----------|-----------|
| Cu1-I1    | 2.6664(3)   | Cu1-P2    | 2.2842(6)  | Cu1-P1    | 2.2837(5) |
| Cu1-N1    | 2.0690(19)  | P2-C7     | 1.815(2)   | P2-C13    | 1.833(2)  |
| Angle     | (°)         | Angle     | (°)        | Angle     | (°)       |
| P2-Cu1-I1 | 106.402(16) | P1-Cu1-I1 | 104.04(16) | P1-Cu1-P2 | 123.82(2) |
| N1-Cu1-I1 | 112.23(7)   | N1-Cu1-P2 | 104.56(7)  | N1-Cu1-P1 | 105.88(6) |

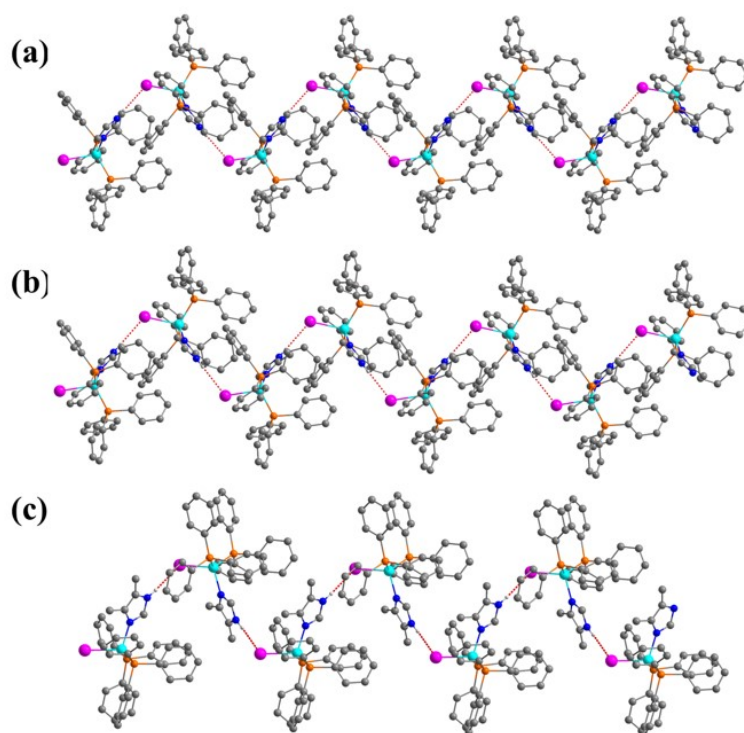

**Fig.S1** (a) The one-dimensional chain structure of **complex 1**. (b) The one-dimensional chain structure of **complex 2**. (c) The one-dimensional chain structure of **complex 3**.

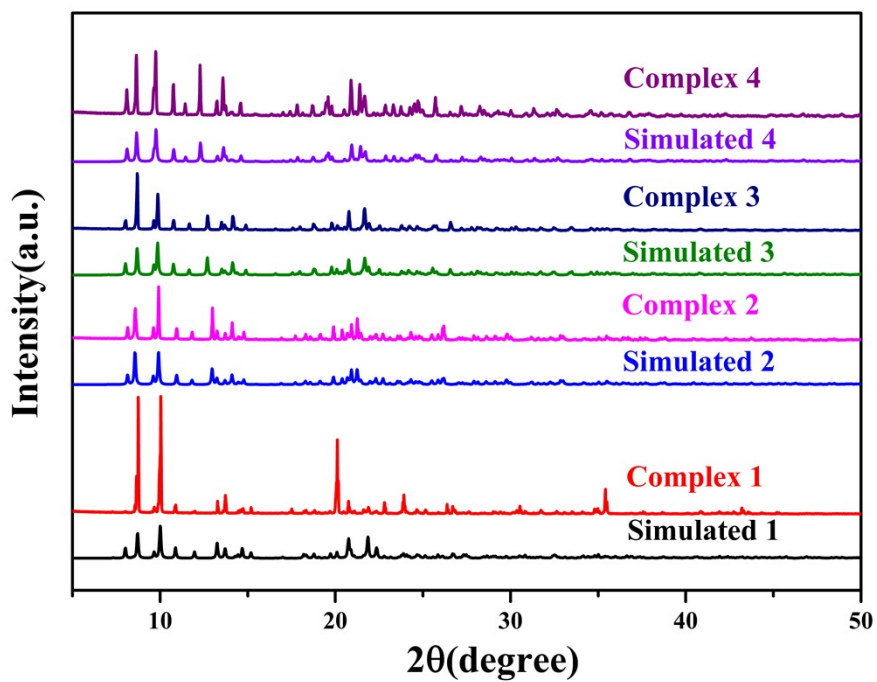

Fig. S2 PXR D pattern of Complex1-4

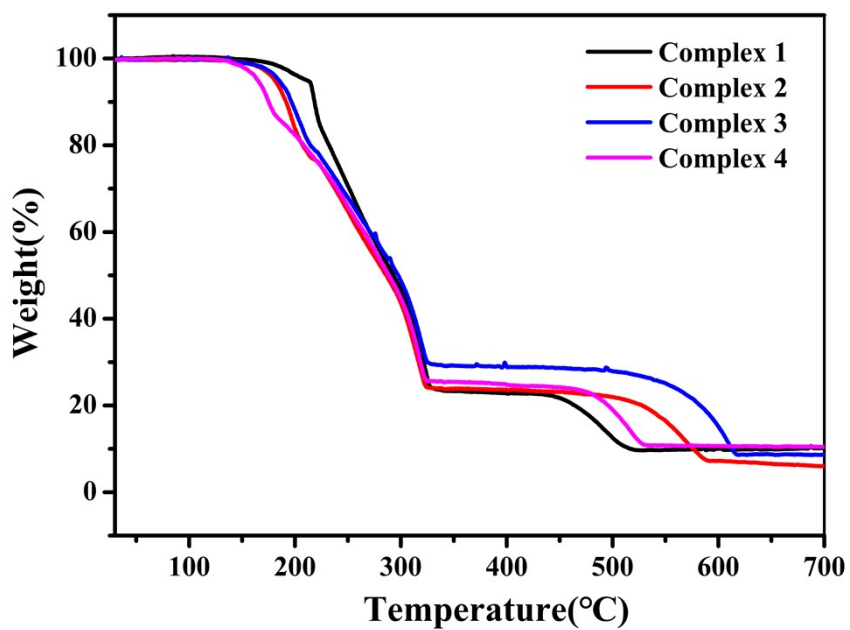

Fig.S3 .TG curves of complexes 1-4

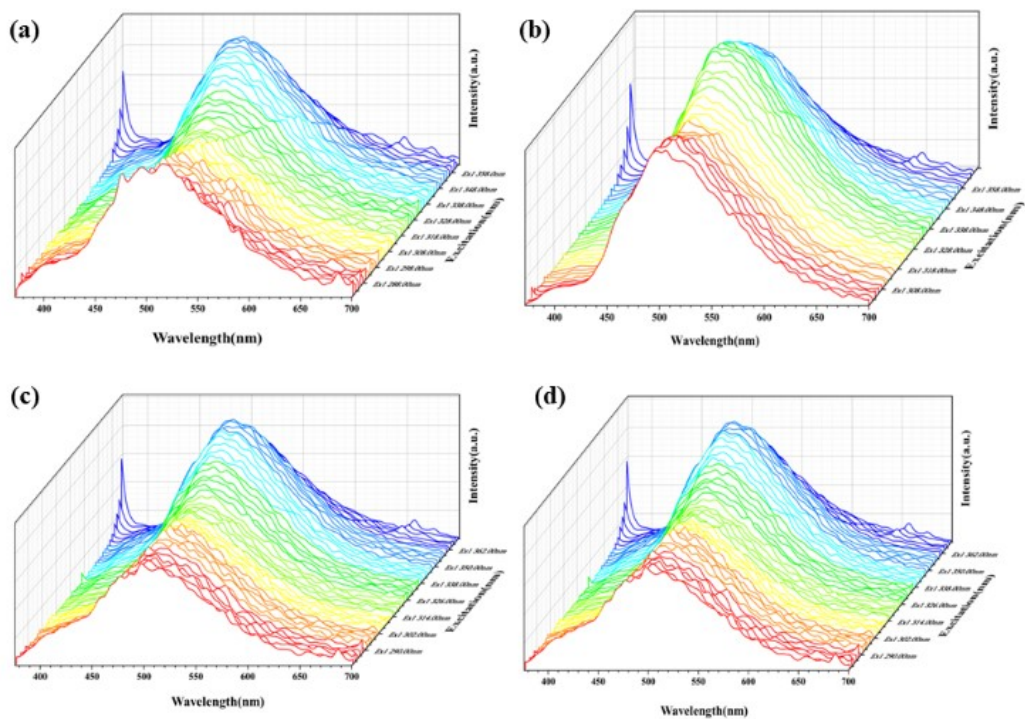

Fig .S4 The excitation-dependent Photoluminescence spectra of complexes 1(a),2(b),3(c) and 4(d)

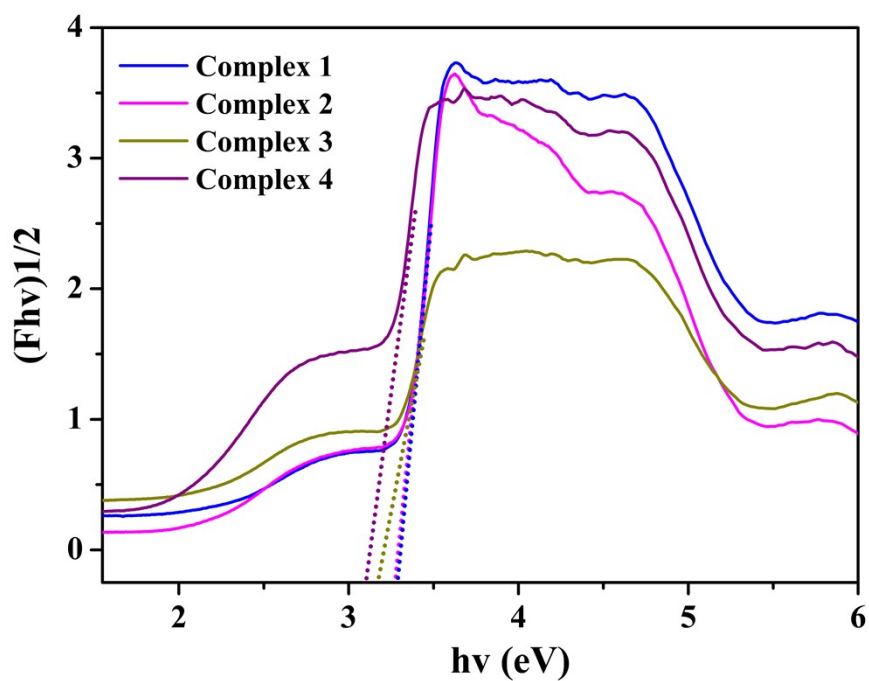

Fig. S5. Optical absorption spectra of Complexes 1-4

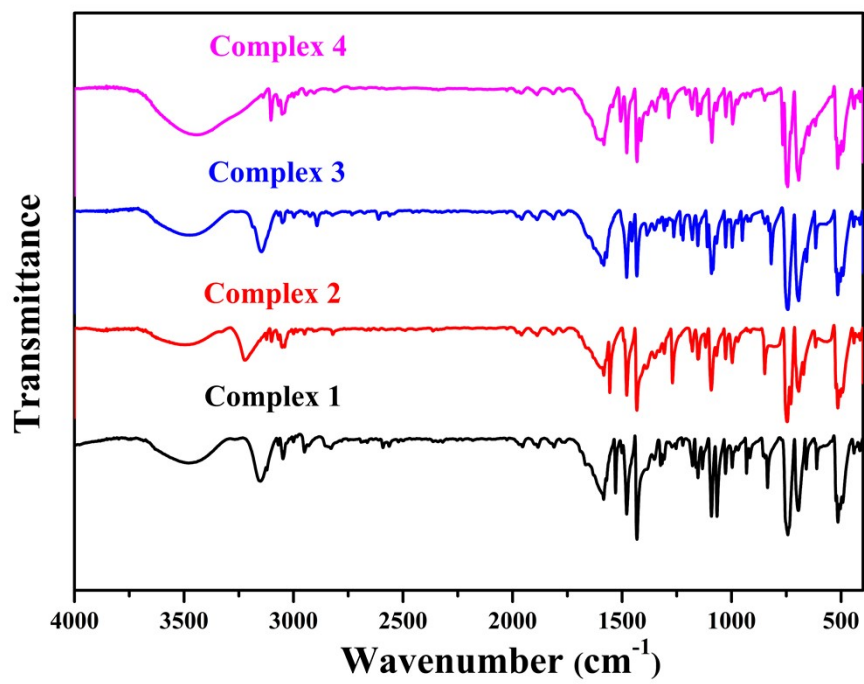

Fig. S6. Infrared Spectroscopy of Complexes 1-4
